# Supplementary material
Source: PubMed Central journal article supplement (PMC3755766)
Supplement: NIHMS485112-supplement.pdf [file NIHMS485112-supplement.pdf]

*Supplementary material for* Effect of distance between decaying  $^{125}\text{I}$  and DNA on Auger-electron induced-double-strand break yield. Balagurumoorthy P, Xu X, Wang K, Adelstein SJ & Kassis AI. International Journal of Radiation Biology, 2012; 88(12):998–1008.

Supplementary Table I. Fluorescence enhancement as an evidence for the binding of Hoechst derivatives to DNA.

| <sup>2</sup> Compound | <sup>1</sup> Fluorescence Yield at 450 nm<br>(arbitrary units) |       |
|-----------------------|----------------------------------------------------------------|-------|
|                       | – DNA                                                          | + DNA |
| I-EH                  | 27.5                                                           | 100.5 |
| I-B-H                 | 3.6                                                            | 161.6 |
| I-C <sub>8</sub> -H   | 5.8                                                            | 115.6 |
| I-C <sub>12</sub> -H  | 7.7                                                            | 115.7 |

<sup>1</sup>Excitation wavelength = 335 nm

<sup>2</sup>Concentration = 18.2  $\mu\text{M}$
